# Supplementary material for: Contribution of low-frequency climatic/oceanic oscillations tostreamflow variability in small, coastal rivers of the Sierra Nevada deSanta Marta (Colombia)
Source: Copernicus journal article supplement (doi:10.5194/hess-2018-491), 2018-10-24
Supplement: Supplementary file 1 [file hess-2018-491-supplement.pdf]

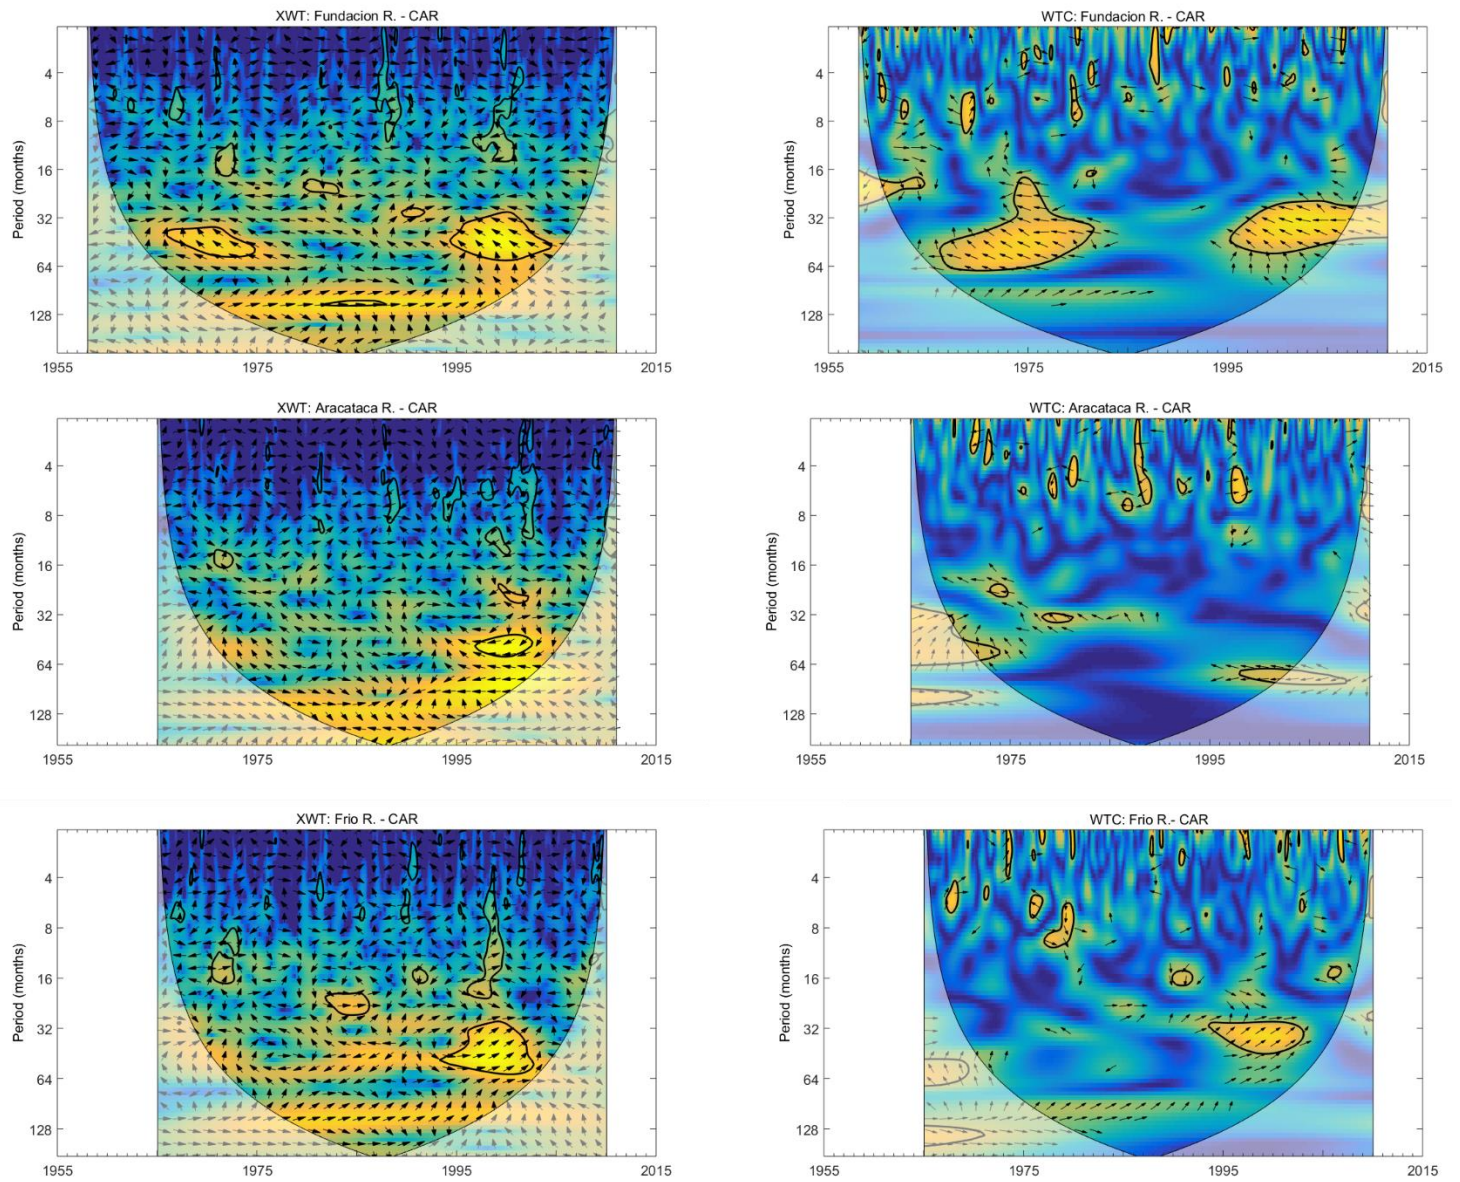

**Fig. S1.** Cross Wavelet Transform (XWT) and Wavelet Coherence (WTC) between CAR and the Fundación, Aracataca, and Frío rivers.

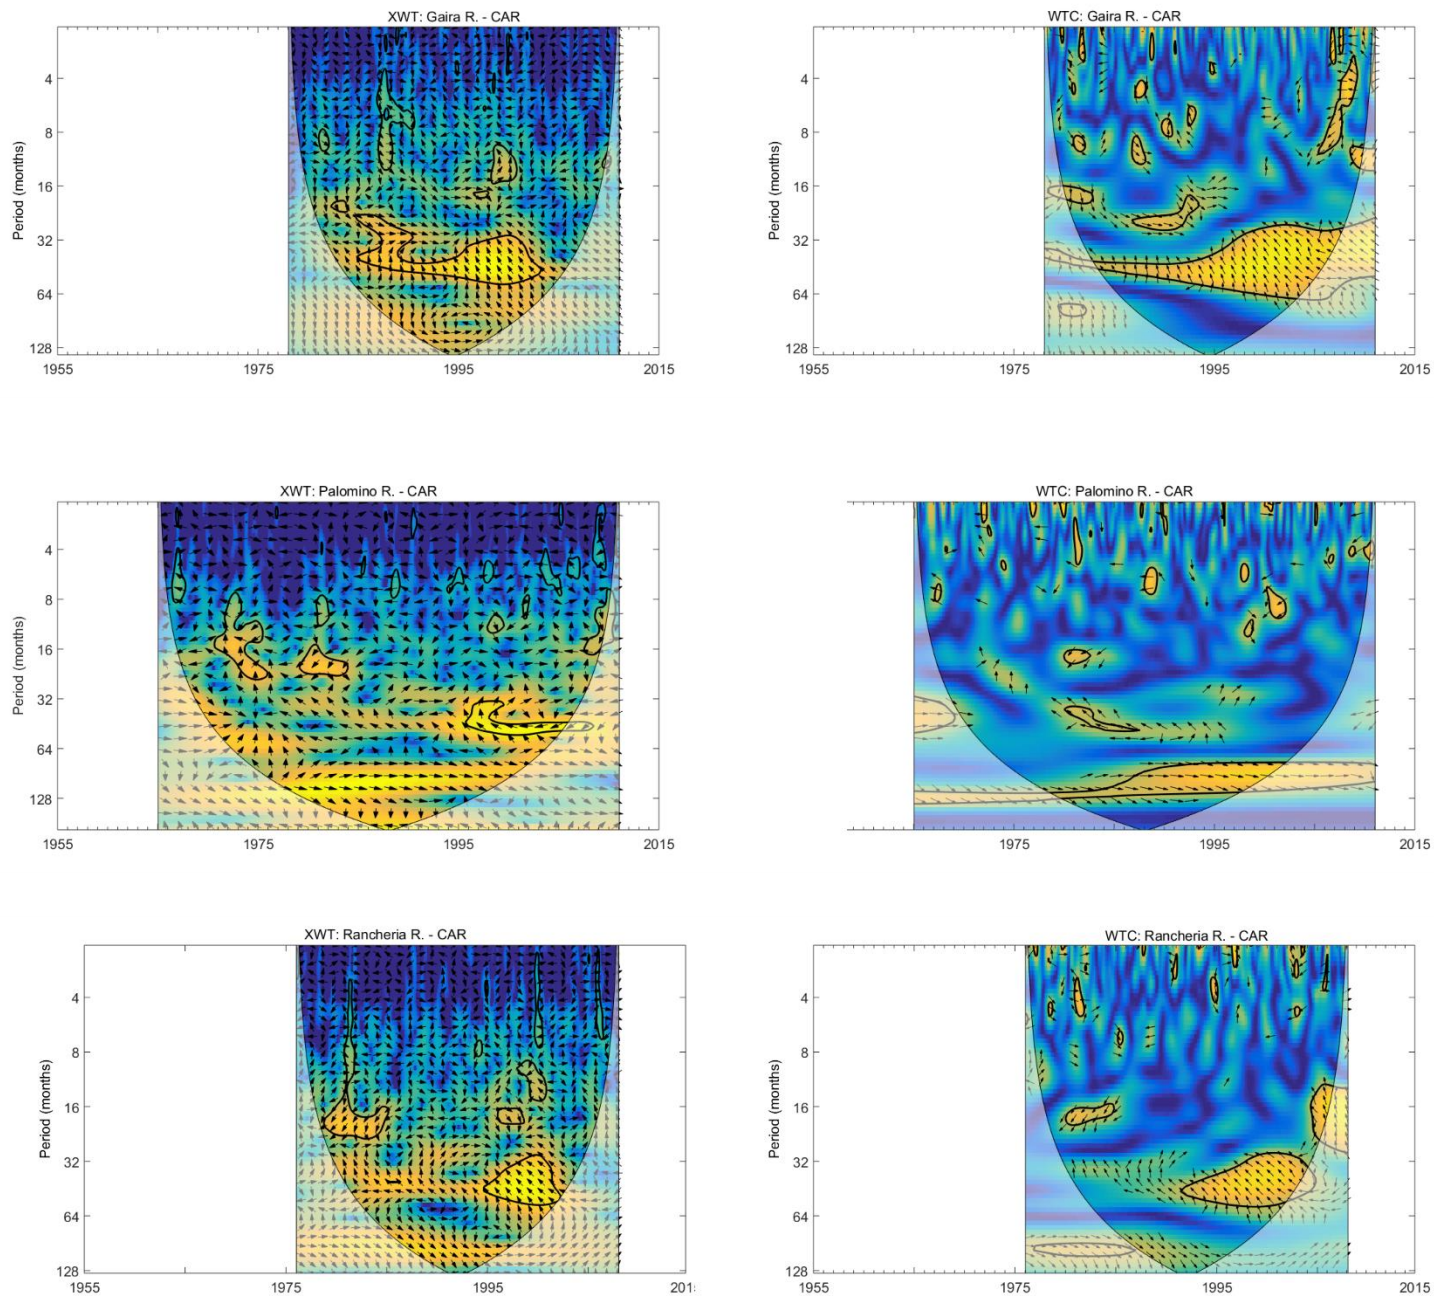

**Fig. S2.** Cross Wavelet Transform (XWT) and Wavelet Coherence (WTC) between CAR and the Gaira, Palomino, and Ranchería rivers.



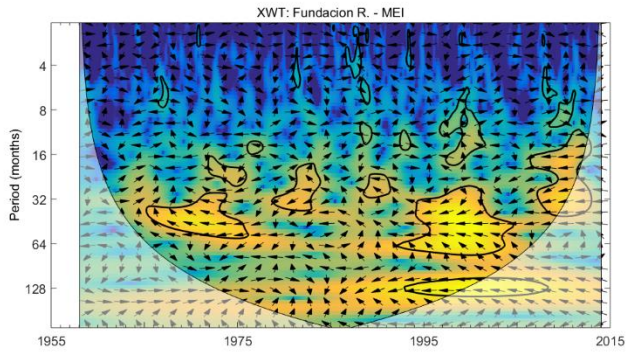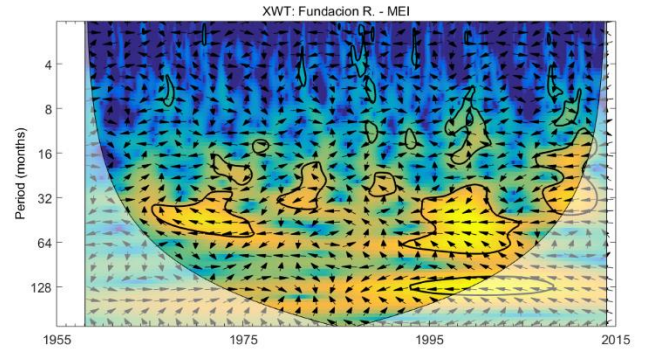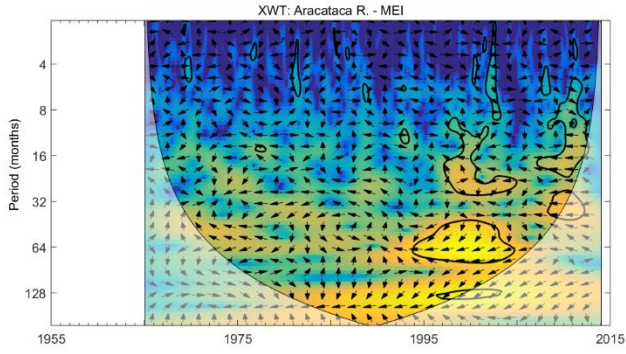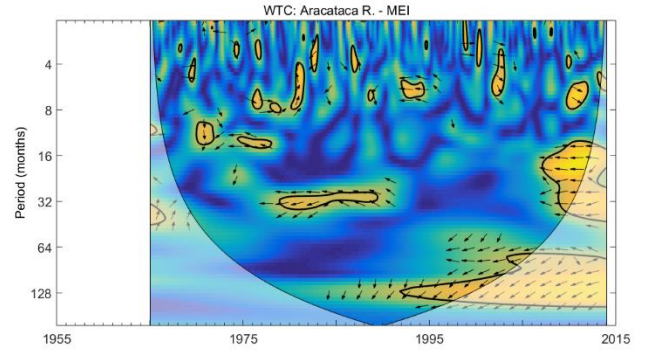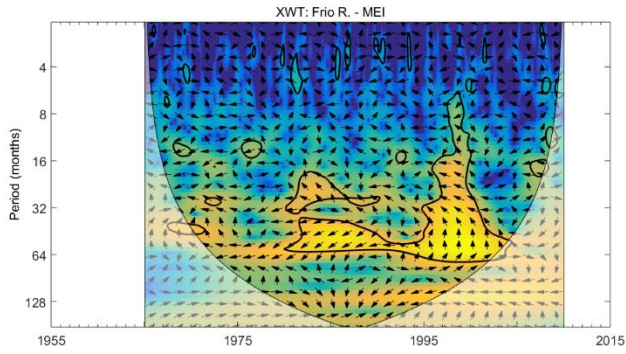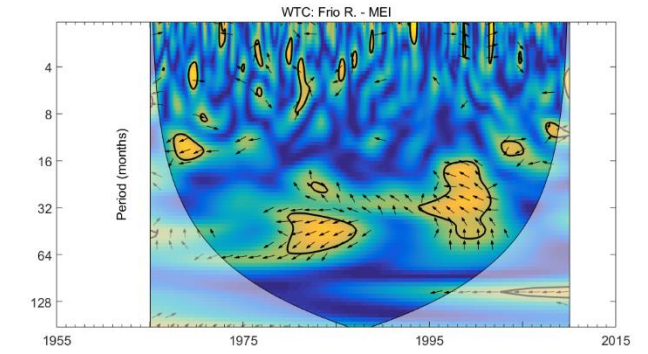

**Fig. S3.** Cross Wavelet Transform (XWT) and Wavelet Coherence (WTC) between MEI and the Fundación, Aracataca, and Frío rivers.

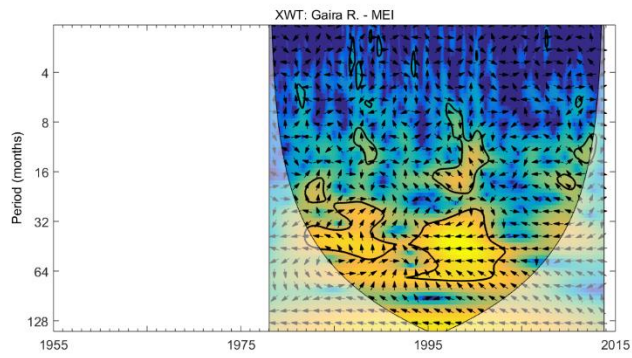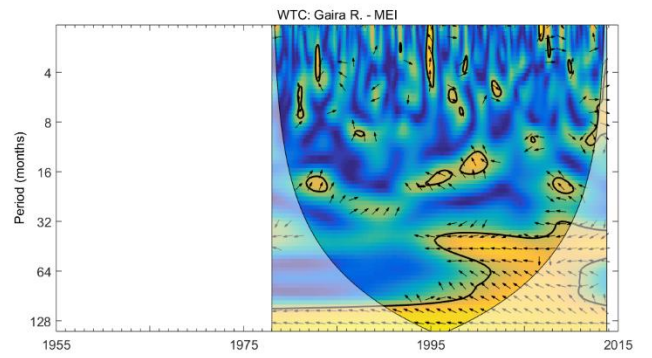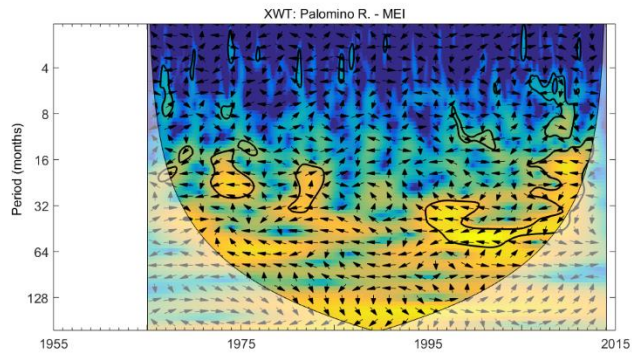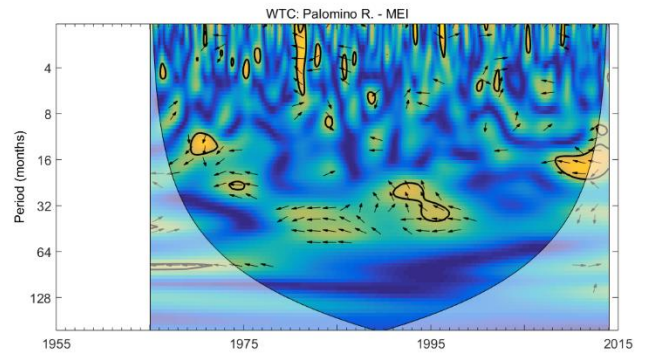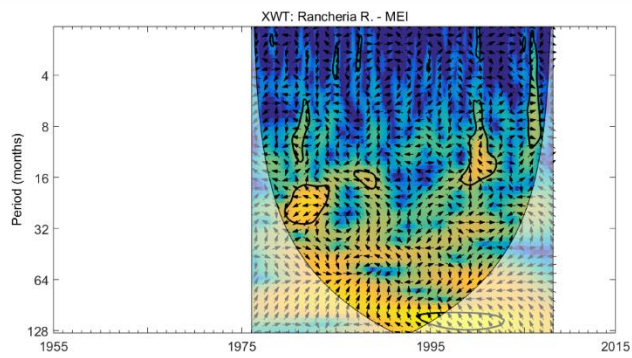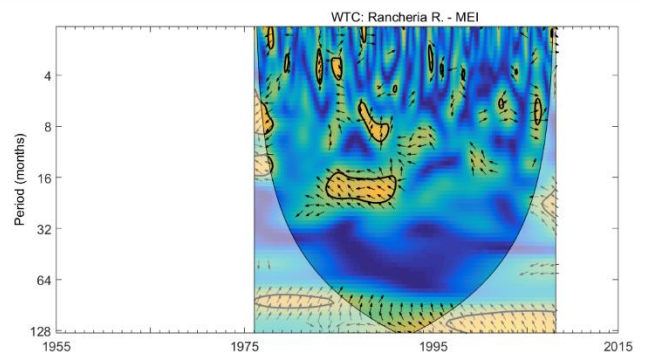

**Fig. S4.** Cross Wavelet Transform (XWT) and Wavelet Coherence (WTC) between MEI and the Gaira, Palomino, and Ranchería rivers.



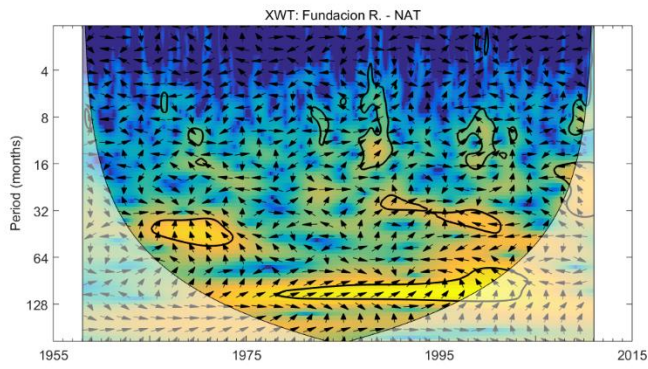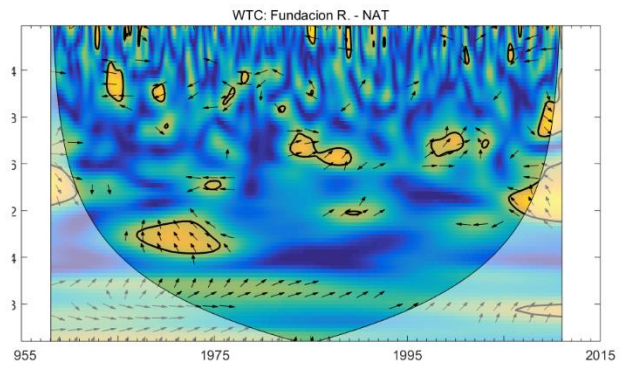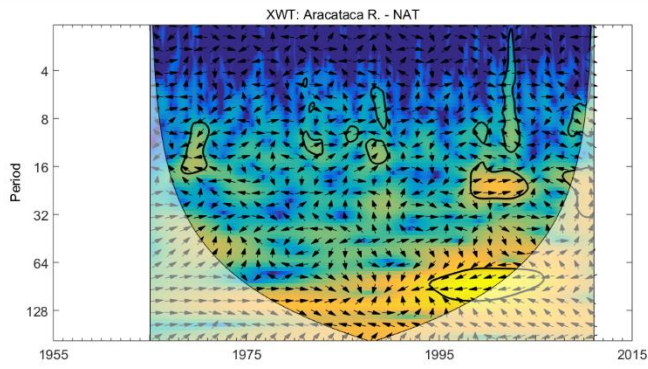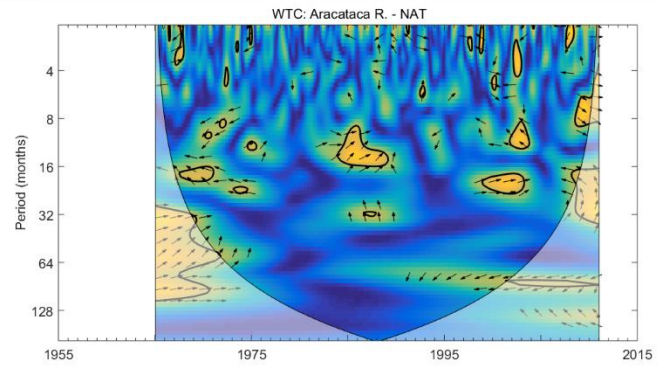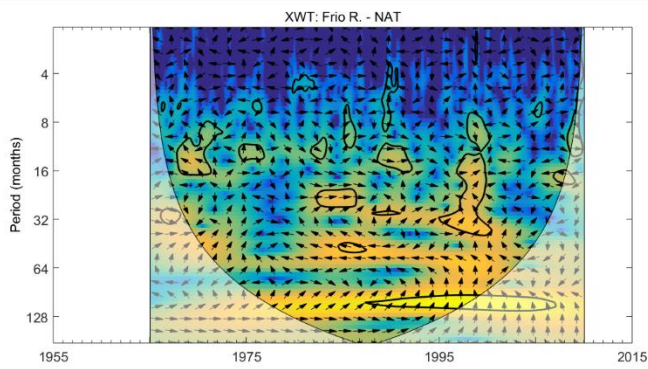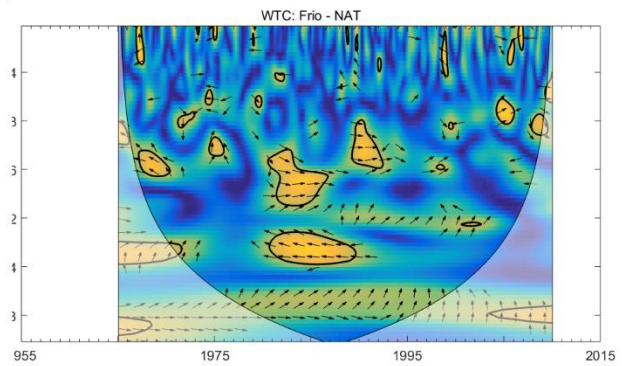

**Fig. S5.** Cross Wavelet Transform (XWT) and Wavelet Coherence (WTC) between NAT and the Fundación, Aracataca, and Frío rivers.

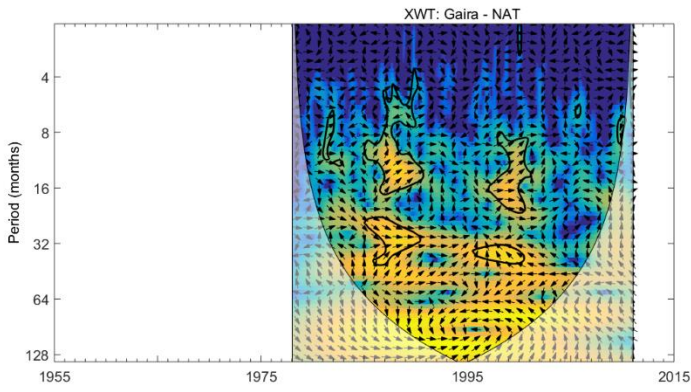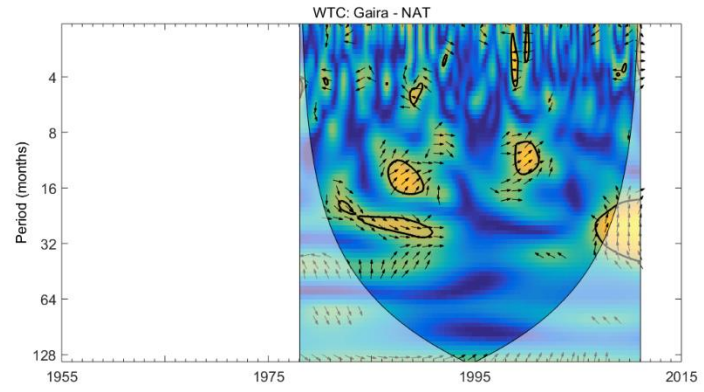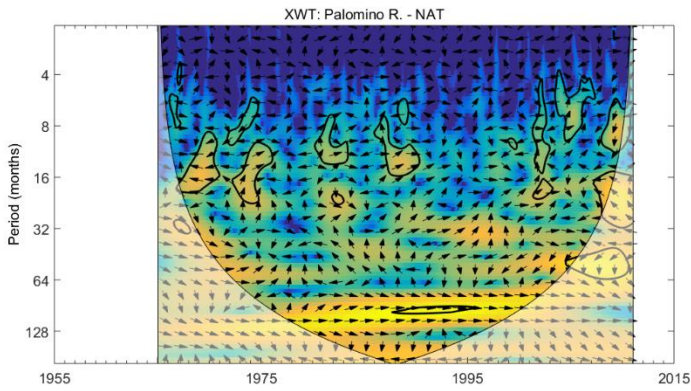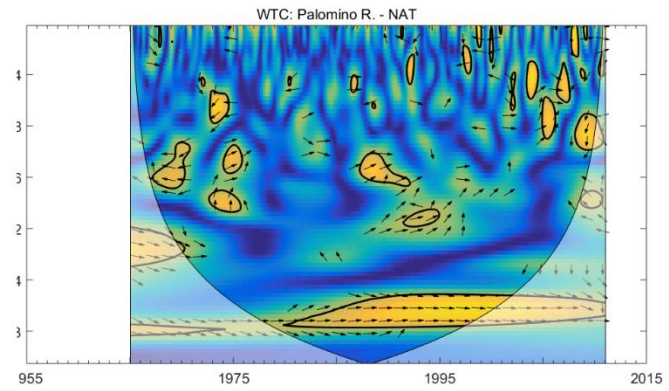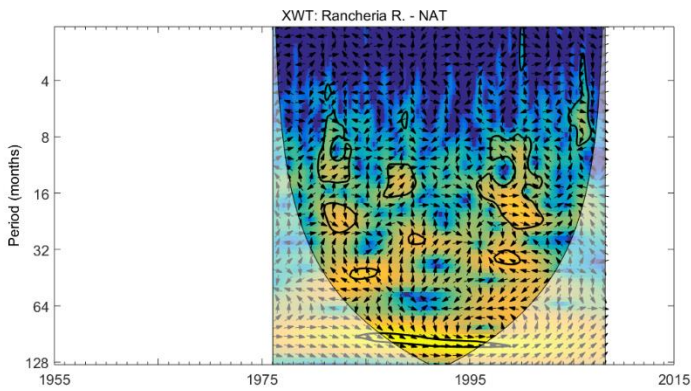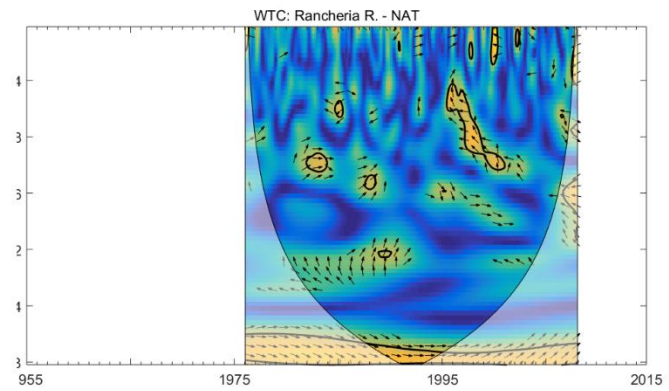

**Fig. S6.** Cross Wavelet Transform (XWT) and Wavelet Coherence (WTC) between NAT and the Gaira, Palomino, and Ranchería rivers.



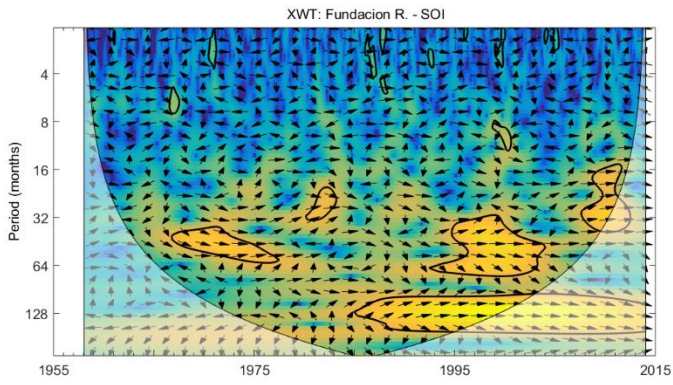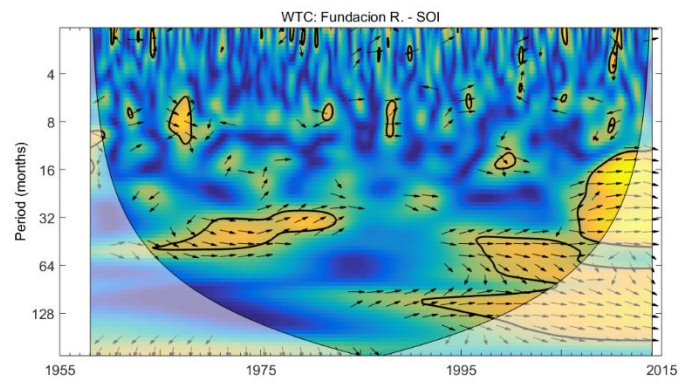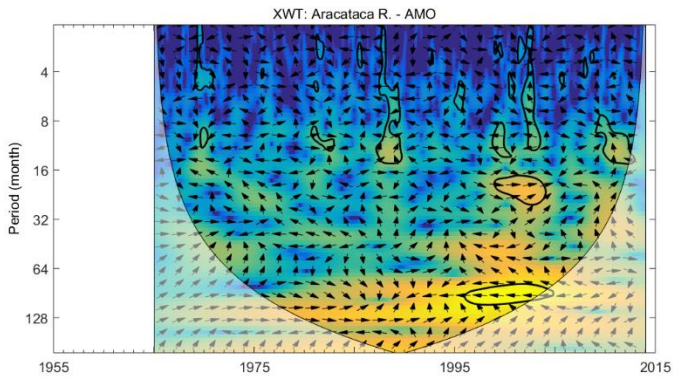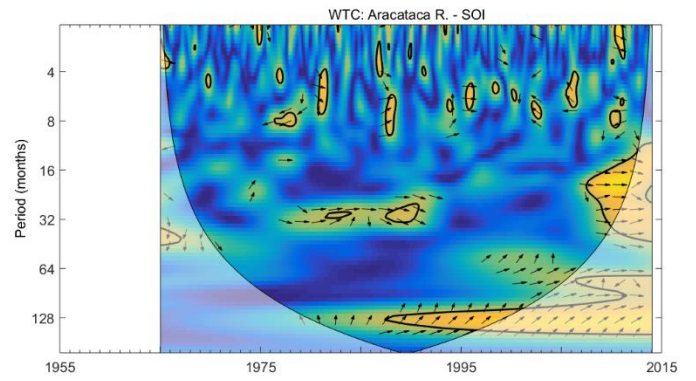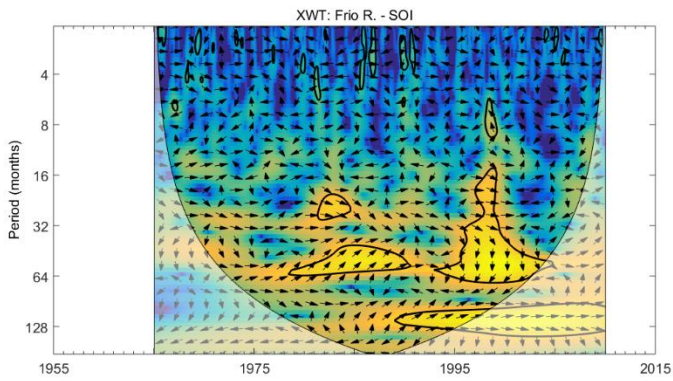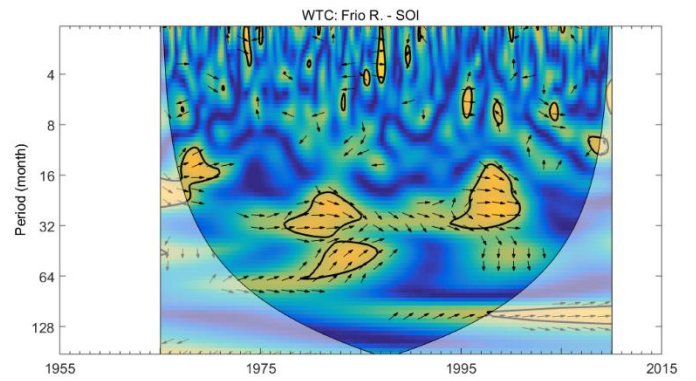

**Fig. S7.** Cross Wavelet Transform (XWT) and Wavelet Coherence (WTC) between SOI and the Fundación, Aracataca, and Frío rivers.

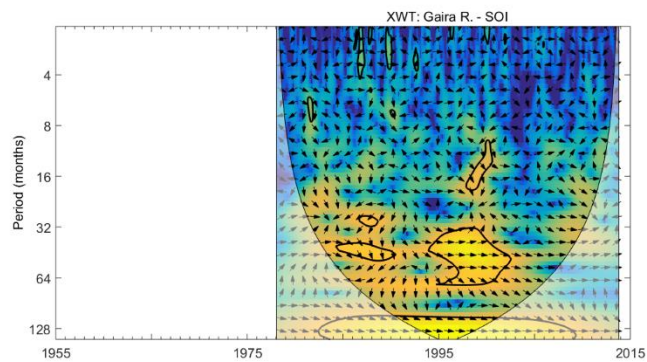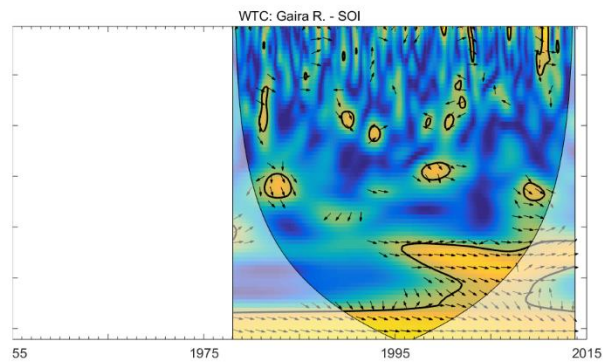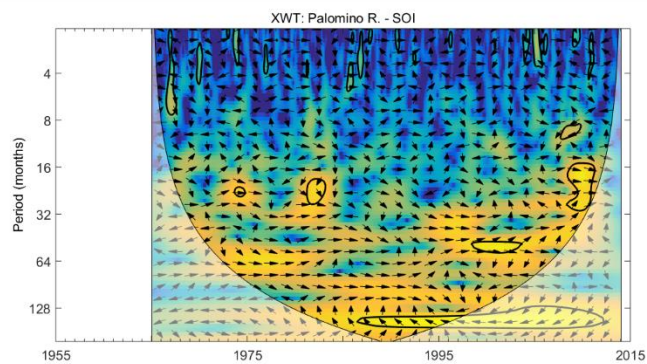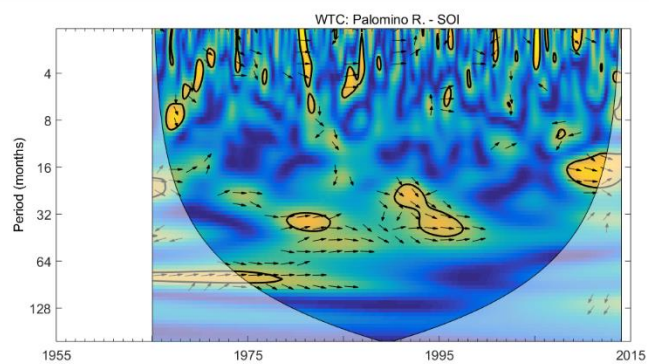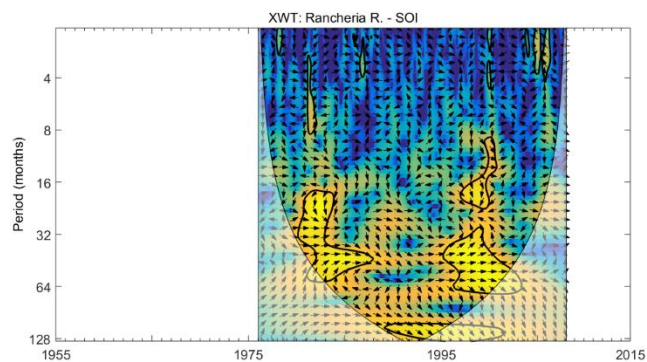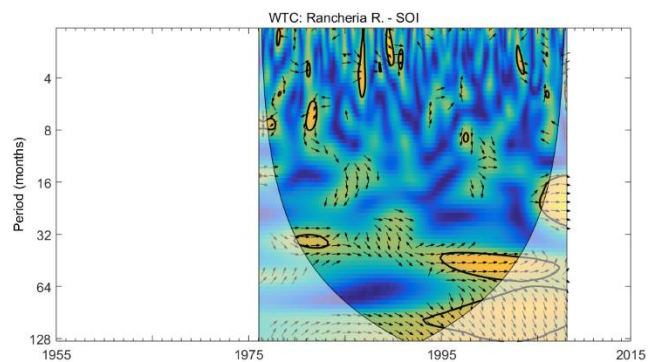

**Fig. S8.** Cross Wavelet Transform (XWT) and Wavelet Coherence (WTC) between SOI and the Gaira, Palomino, and Ranchería rivers.



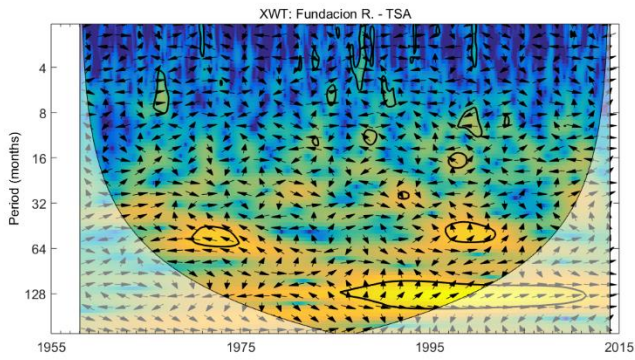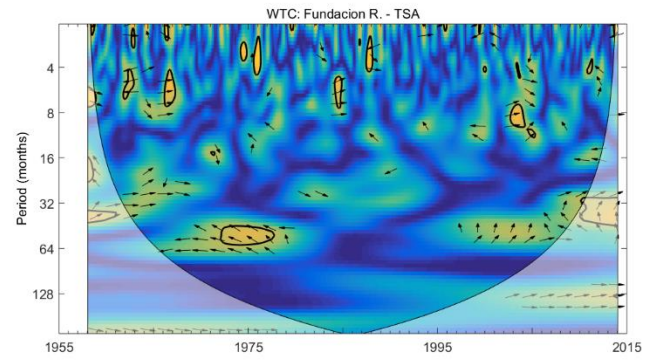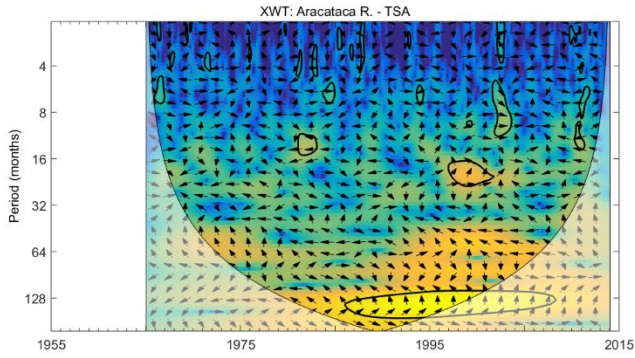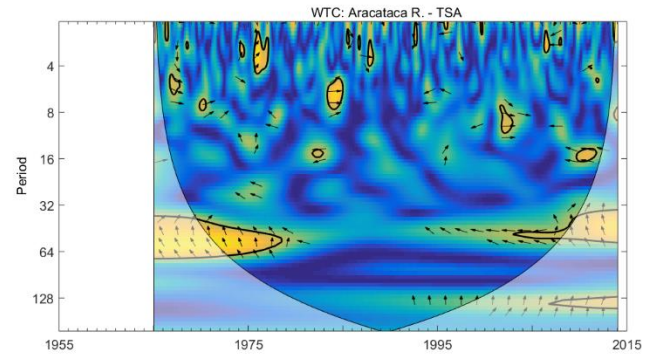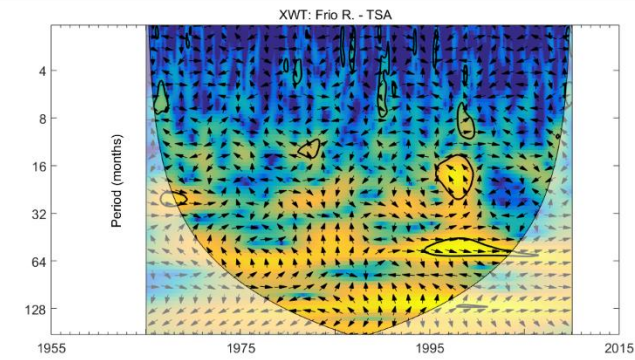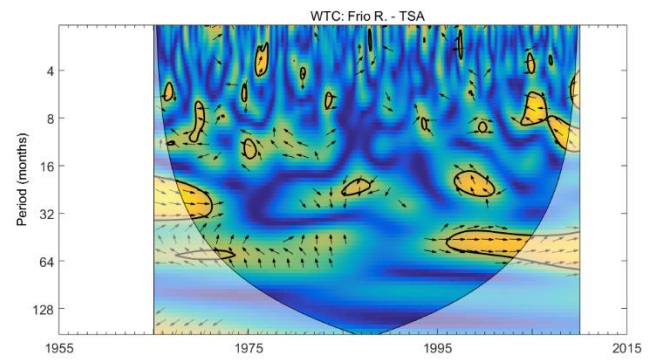

**Fig. S9.** Cross Wavelet Transform (XWT) and Wavelet Coherence (WTC) between TSA and the Fundación, Aracataca, and Frío rivers.

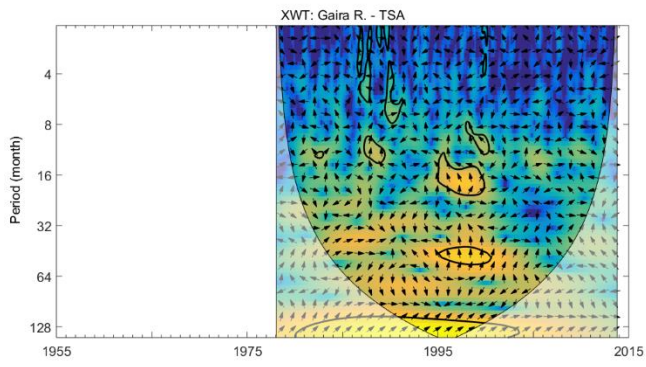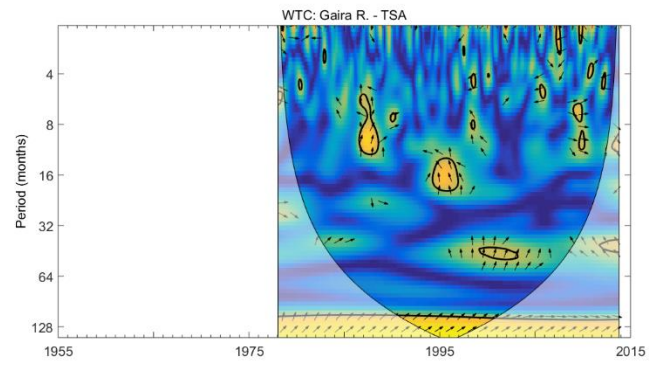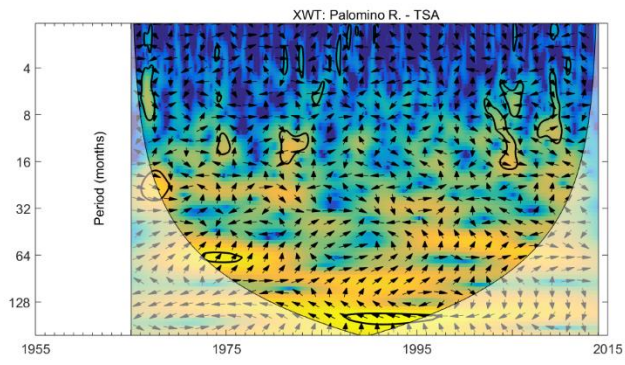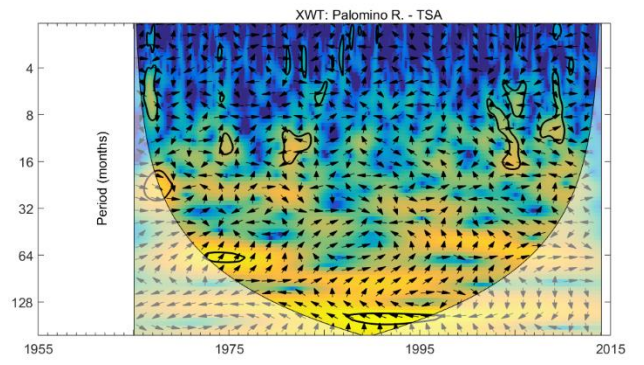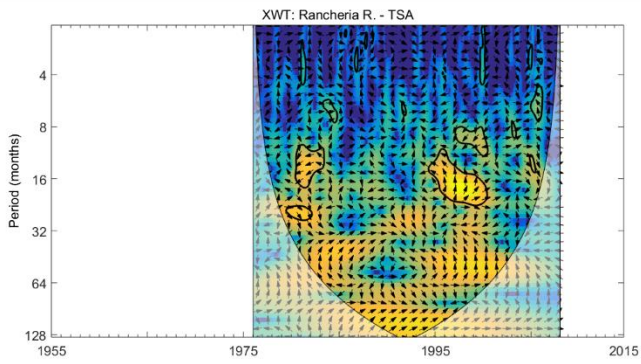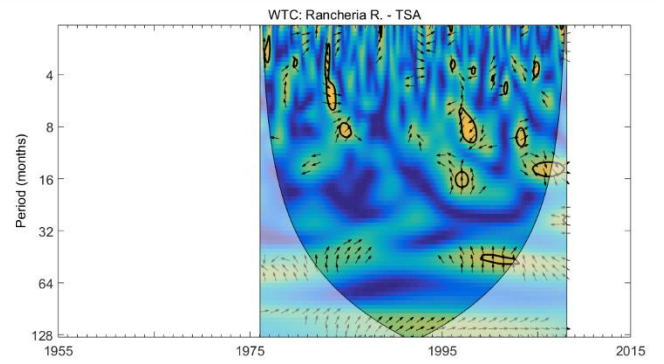

**Fig. S10.** Cross Wavelet Transform (XWT) and Wavelet Coherence (WTC) between TSA and the Gaira, Palomino, and Ranchería rivers.
